# Supplementary material for: Semi-quantitative and visual assay of copper ions by fluorescent test paper constructed with dual-emission carbon dots
Source: Royal Society of Chemistry journal article supplement (doi:10.1039/c8ra00917a), 2018-01-01
Supplement: c8ra00917a1.pdf [file c8ra00917a1.pdf]

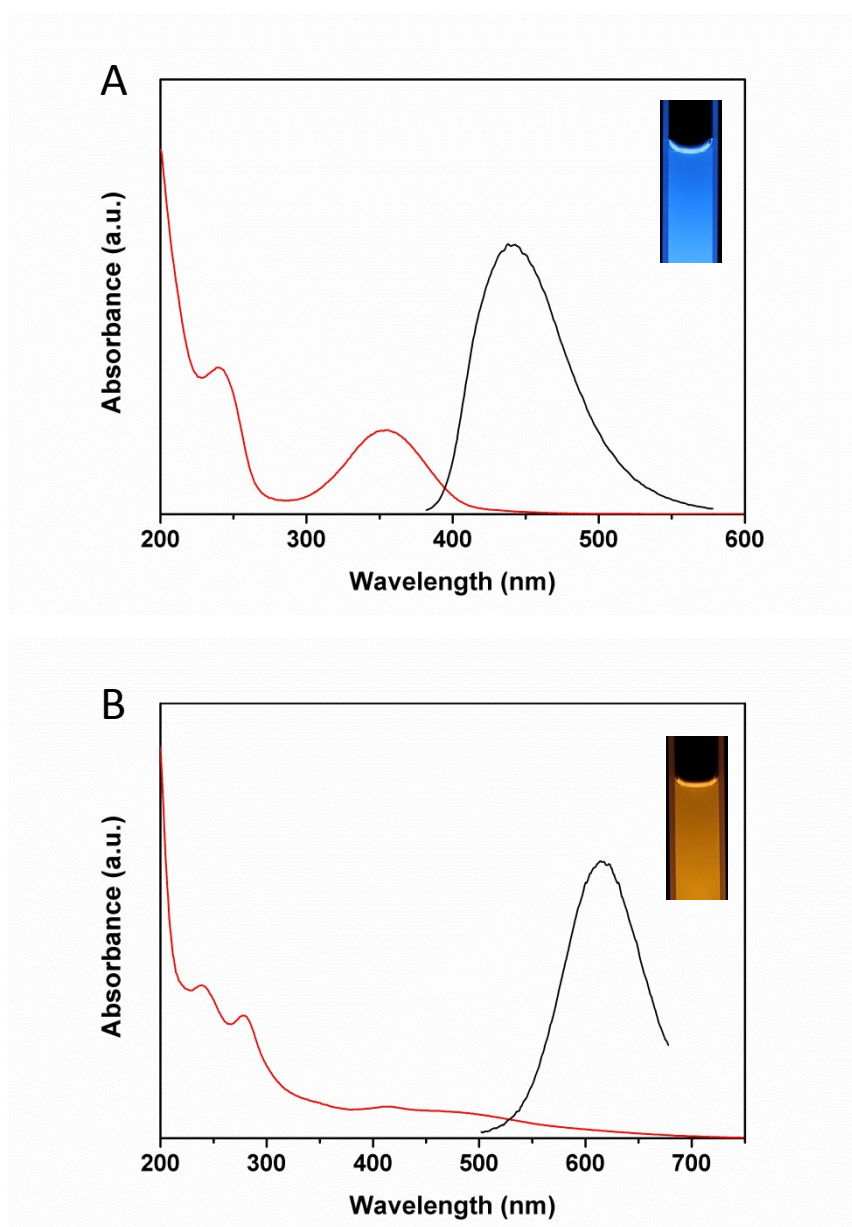

**Figure S1.** (A) UV-vis absorbance and fluorescent emission of BCDs (The inset show the corresponding color under a 365 nm UV lamp). (B) UV-vis absorbance and fluorescent emission of OCDs (The inset show the corresponding color under a 365 nm UV lamp).

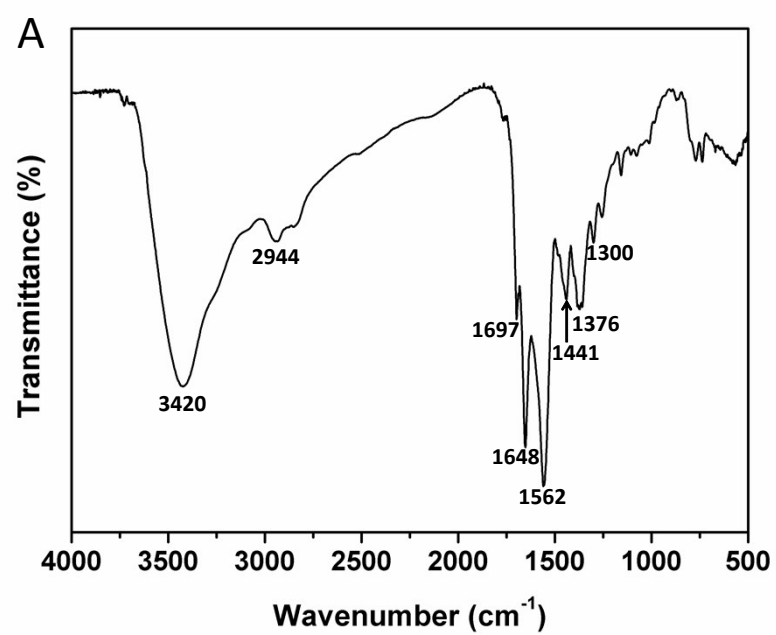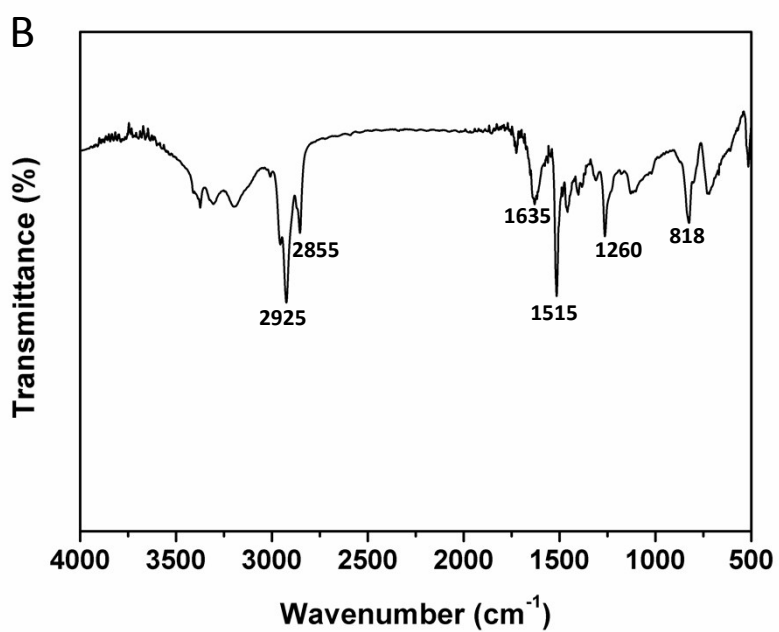

**Figure S2.** The FT-IR spectra (A) of BCDs and (B) of OCDs.

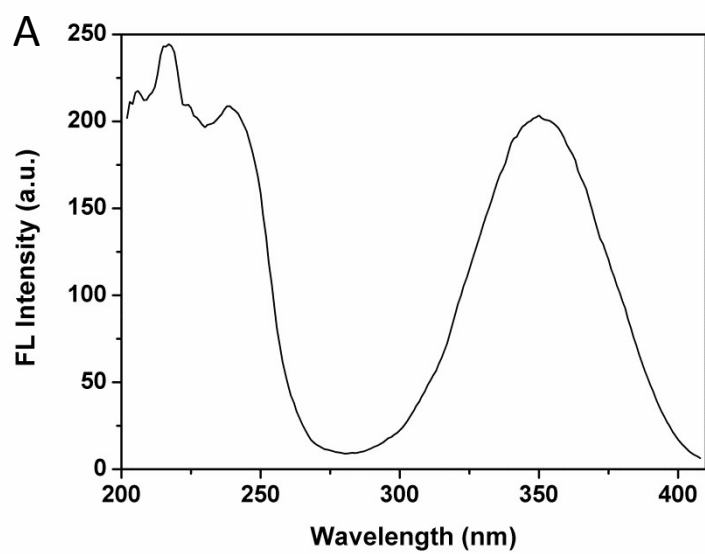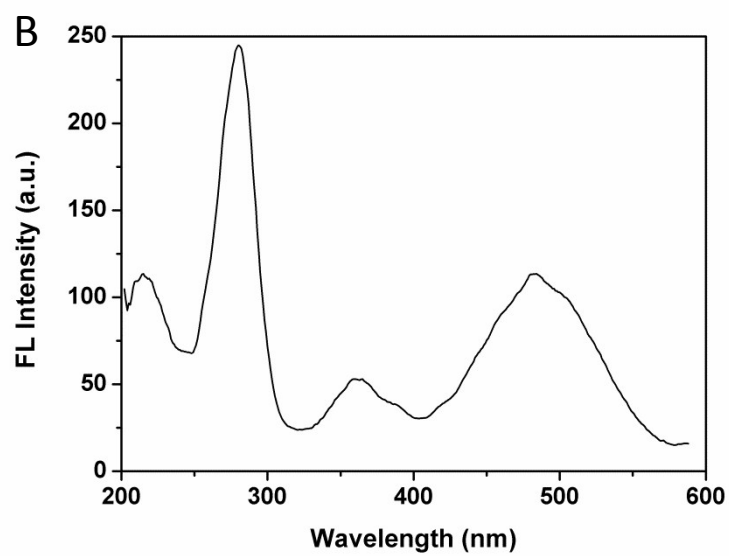

**Figure S3.** The excitation spectrum (A) of BCDs and (B) of OCDs.

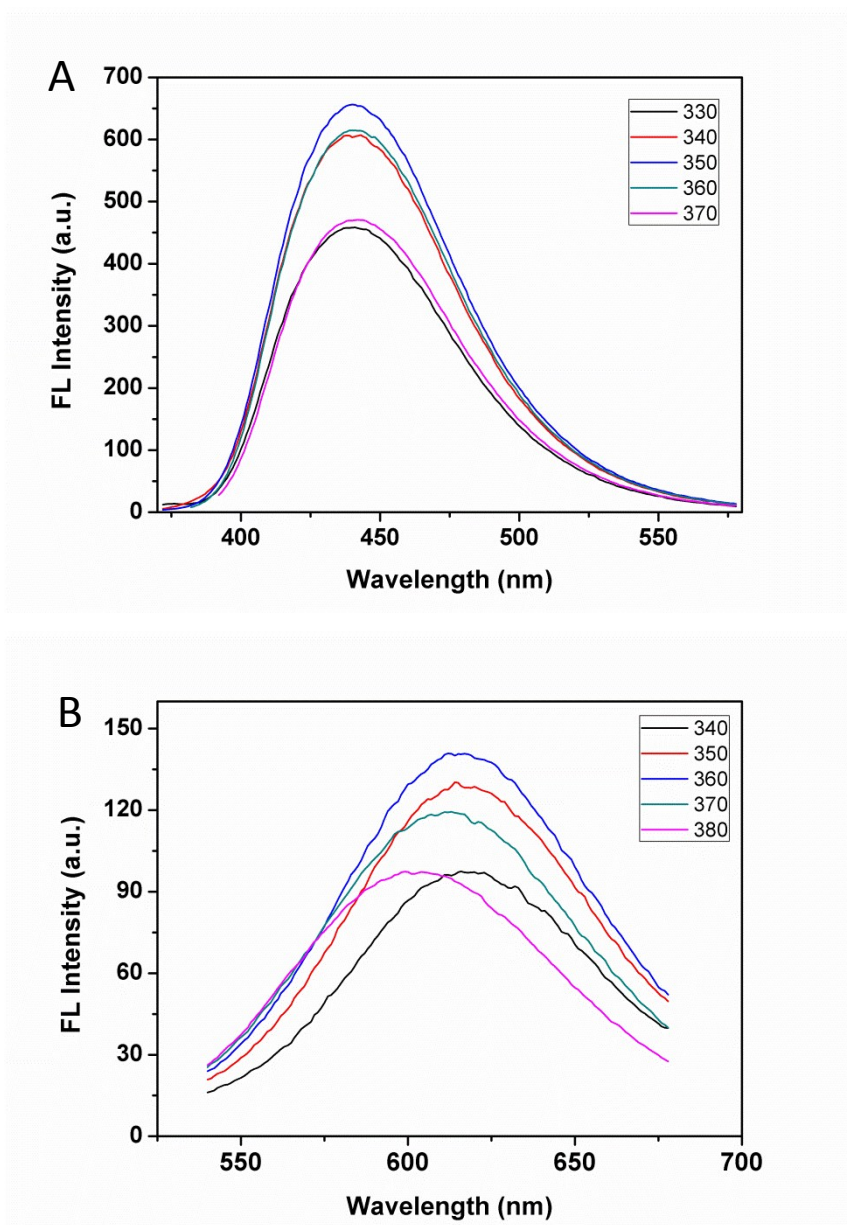

**Figure S4.** (A) FL spectra of the BCDs excited at different wavelengths, (B) FL spectra of the OCDs excited at different wavelengths.

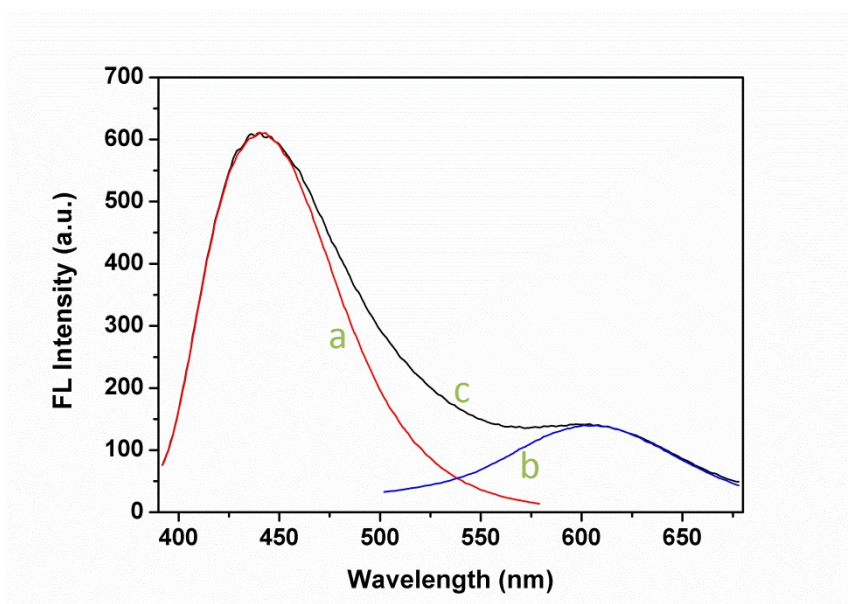

**Figure S5.** Fluorescence emission spectra ( $\lambda_{\text{ex}} = 360 \text{ nm}$ ) of (a) BCDs, (b) OCDs and (c) mixing BCDs and OCDs, respectively.

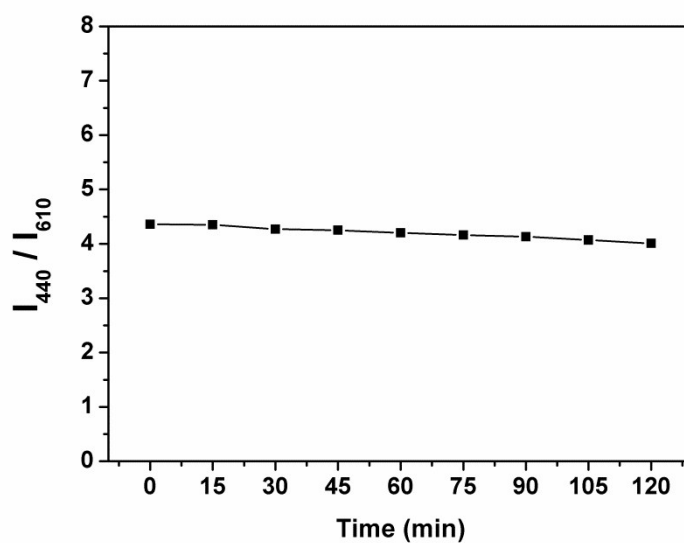

**Figure S6.** Photostability of the ratiometric fluorescence  $I_{440}/I_{610}$  of mixing BCDs/OCDs with the time exposed to 365 nm ultraviolet light for 15 min each time ( $I_{440}$  and  $I_{610}$  are the fluorescence intensities of BCDs and OCDs, respectively).

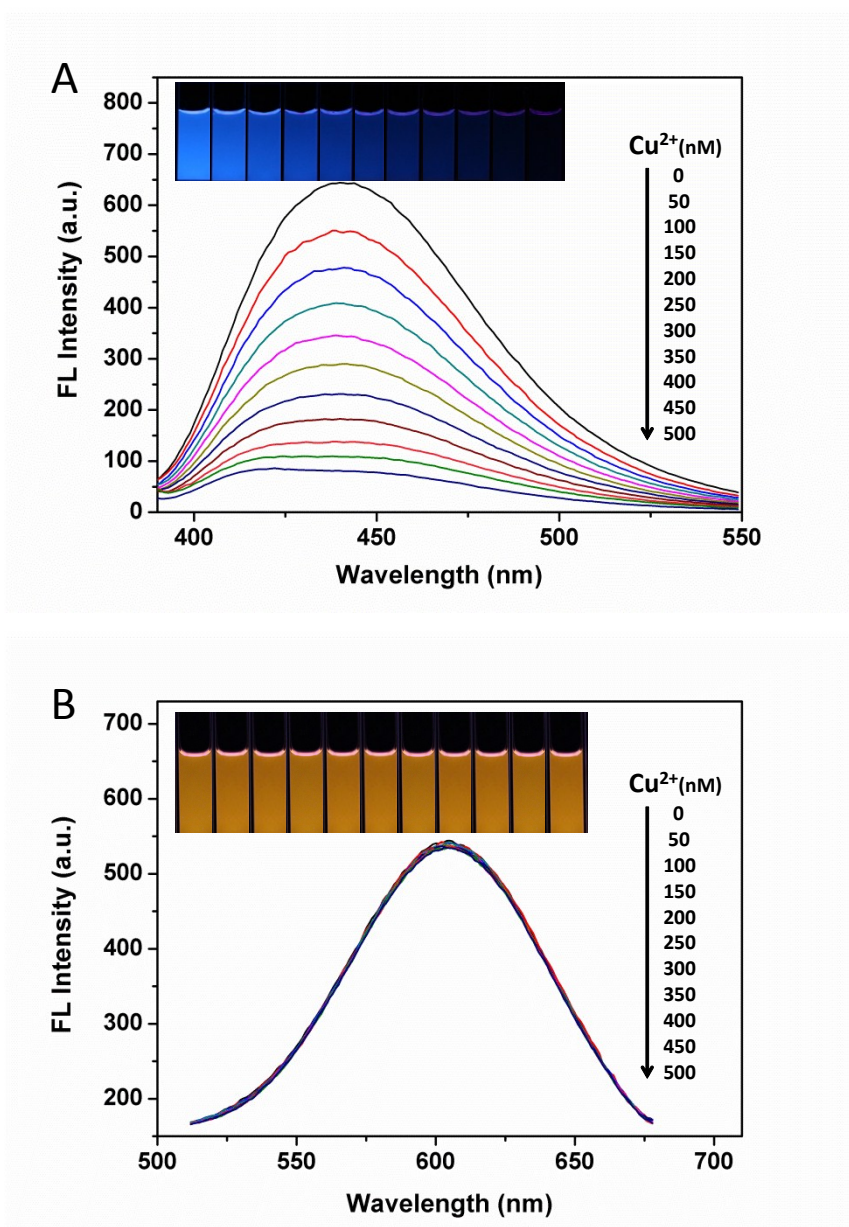

**Figure S7.** The fluorescent emission spectra ( $\lambda_{\text{ex}} = 360$  nm) of (A) BCDs and (B) OCDs with the addition of  $\text{Cu}^{2+}$ . The inset photos show the corresponding color evolutions under a 365 nm UV lamp.

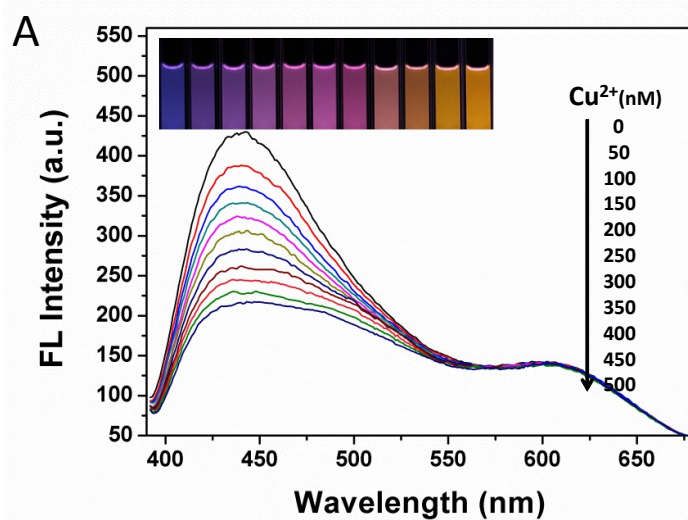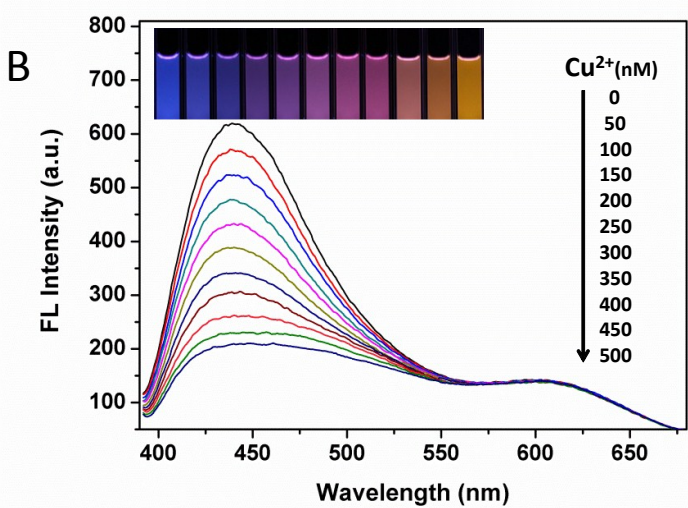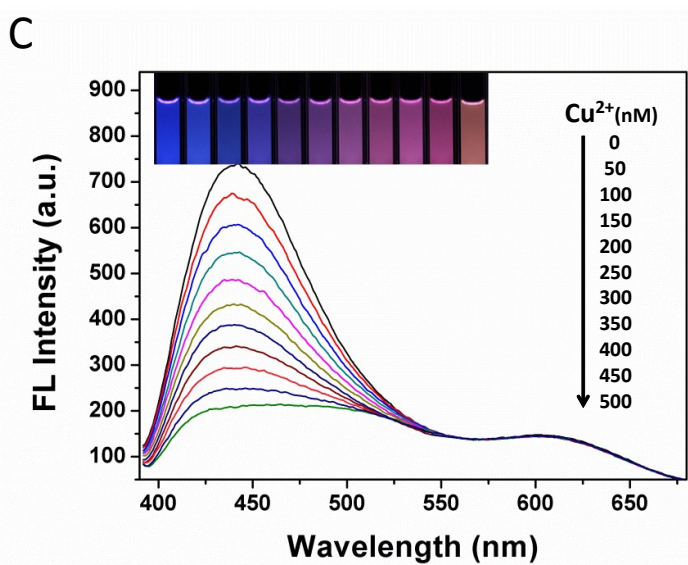

**Figure S8.** The fluorescent spectra of the mixing BCDs/OCDs with the addition of  $\text{Cu}^{2+}$  ions. Before measurements, the fluorescent intensity ratios in the mixing BCDs/OCDs

were adjusted to (A) 3:1, (B) 4:1, (C) 5:1. The insets show the corresponding fluorescent photos under a 365 nm UV lamp.

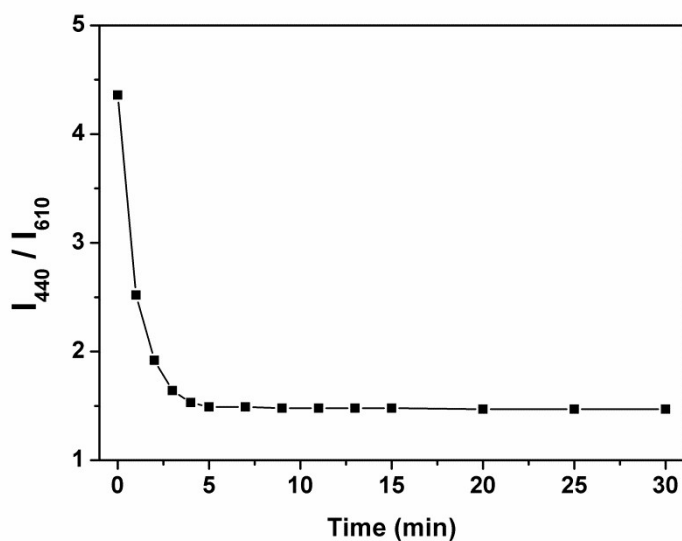

**Figure S9.** The temporal fluorescent response by the ratiometric fluorescence  $I_{440}/I_{610}$  after the addition of 500 nM  $\text{Cu}^{2+}$ .

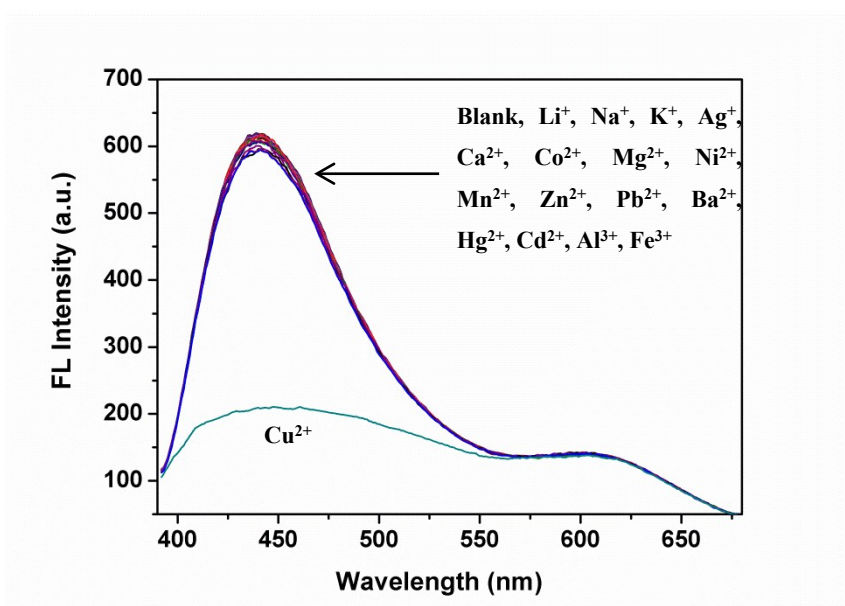

**Figure S10.** The ratiometric fluorescent responses to various metallic ions with  $\text{Cu}^{2+}$ . The selectivity tests were done in HEPES buffer (pH=7.4) with the addition of 5  $\mu\text{M}$  various metallic ions into the mixing BCDs/OCDs (4:1 in fluorescent intensity).



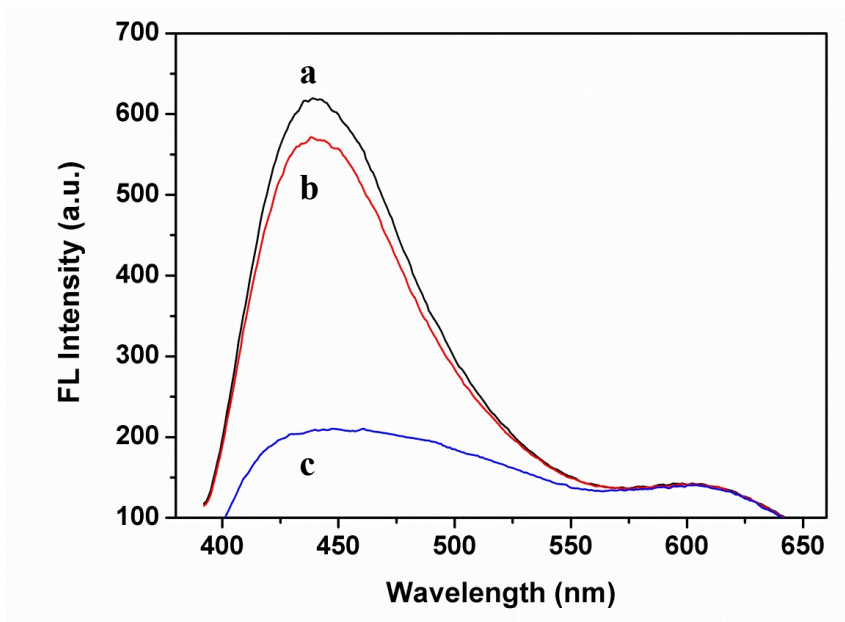

**Figure S11.** The fluorescent spectra of the ratiometric probe after and before the additions of metallic ions. (a) Without any addition of metallic ions. (b) The addition of 5  $\mu\text{M}$   $\text{Na}^+$ ,  $\text{K}^+$ ,  $\text{Zn}^{2+}$ ,  $\text{Al}^{3+}$ ,  $\text{Ni}^{2+}$ ,  $\text{As}^{3+}$ ,  $\text{Li}^+$ ,  $\text{Fe}^{3+}$ ,  $\text{Ag}^+$ ,  $\text{Co}^{2+}$ ,  $\text{Hg}^{2+}$ ,  $\text{Mn}^{2+}$ ,  $\text{Ba}^{2+}$ ,  $\text{Ca}^{2+}$ ,  $\text{Cd}^{2+}$ ,  $\text{Mg}^{2+}$ , and  $\text{Pb}^{2+}$  together. (c) A subsequent addition of 500 nM  $\text{Cu}^{2+}$  in (b).

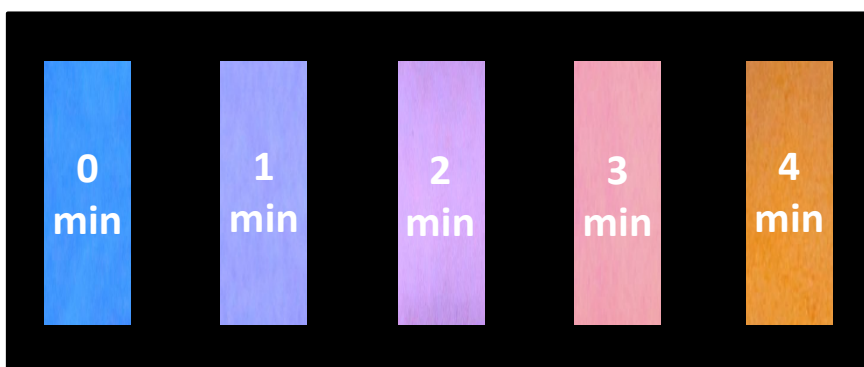

**Figure S12.** The temporal color changes of fluorescent test paper upon the addition of 500 nM  $\text{Cu}^{2+}$ . The photos were taken under a 365 nm UV lamp.
